# Supplementary material for: Gene and protein expression and metabolic flux analysis reveals metabolic scaling in liver ex vivo and in vivo
Source: eLife. 2023 May 23;12:e78335. doi: 10.7554/eLife.78335 (PMC10205083; doi:10.7554/eLife.78335)
Supplement: Figure 2—source data 1. [file elife-78335-fig2-data1.xlsx]

## Sheet: Fig 2.Suppl 1
Figure 2-figure supplement 1A: Liver Glul mRNA normalized to Actb
Mouse	1.41	0.86	0.94	0.81	1.05	0.93
Rat	0.82	0.76	0.8	0.72	0.68	0.74
Figure 2-figure supplement 1B: Liver Lipe mRNA normalized to Actb
Mouse	0.92	1.16	1.13	1.04	0.87	0.88
Rat	0.54	0.67	0.69	0.61	0.74	0.68
Figure 2-figure supplement 1C: Liver Dlst mRNA normalized to Actb
Mouse	1.26	0.83	0.98	0.88	1.05	1
Rat	0.78	0.83	0.72	0.8	0.69	0.74
Figure 2-figure supplement 1C: Liver Mmp3 mRNA normalized to Actb
Mouse	1.04	0.92	1.23	1.04	0.91	0.86
Rat	1.24	1.18	0.93	0.84	0.88	0.93
Figure 2-figure supplement 1E: Liver Larp6 mRNA normalized to Actb
Mouse	1.02	0.83	1.11	1.04	0.93	1.07
Rat	0.89	0.92	1.06	1.09	1.04	0.95
