# Supplementary material for: Gene and protein expression and metabolic flux analysis reveals metabolic scaling in liver ex vivo and in vivo
Source: eLife. 2023 May 23;12:e78335. doi: 10.7554/eLife.78335 (PMC10205083; doi:10.7554/eLife.78335)
Supplement: Figure 3—source data 1. [file elife-78335-fig3-data1.xlsx]

## Sheet: Fig 3
Figure 3E: ALT (U/L)
Mouse	94	102	128	101	70
Rat	48	49	51	62	44
Human	29	25	17	25	22
Figure 3F: AST (U/L)
Mouse	174	208	196	180	236
Rat	102	115	89	134	120
Human	43	50	36	39	40

## Sheet: Fig 3.Suppl 1
Figure 3-figure supplement 2A: Liver PC activity
Mouse	1.36	1.04	0.92	0.89	0.79
Rat	0.51	0.46	0.7	0.62	0.53
Figure 3-figure supplement 2B: Liver peroxidase activity
Mouse	0.89	0.98	1.13	1.05	0.95
Rat	0.73	0.78	0.64	0.61	0.68
