# Supplementary material for: Gene and protein expression and metabolic flux analysis reveals metabolic scaling in liver ex vivo and in vivo
Source: eLife. 2023 May 23;12:e78335. doi: 10.7554/eLife.78335 (PMC10205083; doi:10.7554/eLife.78335)
Supplement: Figure 4—source data 1. [file elife-78335-fig4-data1.xlsx]

## Sheet: Fig 4
Figure 4C: Glucose Production
Mouse	Rat
0.00296	0.00662454
0.0169	0.008277
0.0134	0.006785
0.0264	0.017115
0.0306	0.013267
0.0213	0.013113
Figure 4D: Vpc
Mouse	Rat
0.00246	0.00549837
0.0127	0.006043
0.0118	0.005021
0.0203	0.012323
0.0281	0.010879
0.0155	0.010228
Figure 4E: Vcs
Mouse	Rat
0.00273	0.00894275
0.0161	0.013191
0.014	0.007321
0.0208	0.050181
0.0268	0.027949
0.0192	0.028738
Figure 4F: VPDH
Mouse	Rat
0.000308	0.000940164
0.00239	0.001814
0.00123	0.000627
0.00241	0.005785
0.00279	0.002766
0.00154	0.002977
Figure 4G: NEFA production
Mouse	Rat
1.01e-09	1.26e-10
5.91e-10	1.68e-10
5.08e-11	2.8e-11
3.95e-10	7.67e-11
3.82e-11	1.55e-10
7.22e-10	3.03e-10
Figure 4H: fatty acid oxidation (nmol/g protein/hr)
Mouse	Rat
0.00242	0.00800258
0.0137	0.011378
0.0127	0.006694
0.0184	0.044396
0.024	0.025182
0.0177	0.025762
Figure 4I: oxygen consumption (pmol/min, normalized to total protein)
	Time (min)	Mouse											Rat
Basal	0	124.4	105.8	133.8	142.6	126.7	159.8	172.7	176.8	191.6	133.9		138.7	132.6	116.7	120.4	159.7	193.4	235.1	174.8	154.1	135.9
	10	128.6	103.6	135.9	140.8	130.2	161.2	164.1	173.4	188.4	134.2		134.5	144.8	104.8	122.1	169.2	188.6	226.4	172.9	153.6	133.2
	20	120.3	103.2	130.1	139.4	134.5	157.6	157.6	166.9	183.2	130.1		127.9	151.9	102.9	118.6	170.1	180.1	232.6	171.7	150.8	130.6
Oligo	30	18.6	20.3	16.7	17.5	15.3	12.4	25.1	22.3	25.8	20.2		25.4	18.7	13.2	12.1	18.8	22.4	29.7	18.6	19.7	15.4
	40	0.3	21.2	18.1	17.1	15.9	20.8	28.7	25.4	24.1	23.5		23.6	14.3	14.9	15.3	12.2	23.5	28.4	18.3	17.4	15.1
	50	22.4	24.6	16.3	16.4	14.2	21.5	23.3	20	20.6	21.2		23.8	15.5	14.4	14.7	10.4	24.6	28.6	18.9	22.8	14.6
FCCP	60	254.1	259.6	273.7	280.8	259.4	306.9	338.7	297.6	356.1	279.8		239.7	271.9	286.7	311.4	251.6	272.9	335.9	272.9	296.8	311.6
	70	248.6	271.4	265.8	278.5	261	312.4	324.9	294.1	354.8	282		275.6	282.4	259.4	302.9	234.2	301.4	356.2	275.1	291.4	315.4
	80	242.6	255.4	269.1	286.7	281.5	307.2	316.4	290.2	359.6	284		241.8	280.8	263.1	305.4	226.7	296.8	354.1	276.8	292.7	336.1
Antimycin/rotenone	90	0.2	2.4	0.7	1.8	1.3	0.5	0	1.3	2.2	5.4		1.3	5.6	1.2	1.4	0.5	2.9	4.5	1.7	0	1.2
	100	1.8	2.6	0	1.4	0	0	1.2	1.5	2.8	4.7		2.7	1.2	0.9	1.8	0	2.3	4.9	2.2	0	1.8
	110	1.3	3.5	0	2.6	0	0	1.5	1.5	2.4	4.9		2.2	0	0	1.6	0	2.6	4.2	2.3	0.3	1.2

## Sheet: Fig 4.Suppl 1
Figure 4-figure supplement 3A: lactate APE (%)
Hours	Mouse							Hours	Rat
1	49.2	48.6	49.3	48	47.7	48.2		1	49.3	49	49	48.3	47.2	49.2
2	48.4	48.1	47.6	49.2	47.6	48.6		2	47.8	49.4	47.9	48.6	49.3	48.8
3	48.9	49	49.4	49.4	49.2	49.3		3	49.5	47.5	48.6	49.3	47.5	48.4
4	48	47.9	48.8	49.4	48.3	47.2		4	49.3	49	47.3	47.4	48.1	49.2
5	48.9	47.7	49.1	49	48.7	49.2		5	48.7	48.5	49.5	49.3	47.9	49.4
6	47.8	48.6	48.2	49.1	49.5	47.7		6	47.9	47.7	48.6	49	48.7	49.2
Figure 4-figure supplement 3B: glucose concentration (ng/mL)
Hours	Mouse							Hours	Rat
0	0	0	0	0	0	0		0	0	0	0	0	0	0
1	0.544	0.376	0	0	0.994	0.516		1	0.001	0.162	0.217	0.255	0	0.185
2	0.631	0.483	0.228	0.215	0.879	0.425		2	0.089	0.314	0.464	0.375	0.109	0.355
3	0.911	0.779	0.252	0.313	1.263	0.751		3	0.27	0.415	0.53	0.504	0.284	0.484
4	1.326	0.964	0.437	0.451	1.582	0.946		4	0.407	0.648	0.774	0.768	0.382	0.793
5	1.469	1.05	0.598	0.549	1.757	1.105		5	0.606	0.865	1.367	0.997	0.514	0.98
6	1.581	1.15	0.734	0.683	1.938	1.256		6	0.609	0.989	1.633	1.188	0.548	1.162
Figure 4-figure supplement 3C: glucose APE (%)
Hours	Mouse m+1							Hours	Mouse m+2							Hours	Rat m+1							Hours	Rat m+2
1	20.8	17.5	27.2	16.9	30.2	28.6		1	2.52	2.57	3	1.62	3.15	2.59		1	18.4	25.1	18.1	32.1	17.9	23.4		1	2.35	1	2.52	2.57	3.7	2.54
2	20.5	18	28.4	16.3	30.5	30		2	2.46	2.34	3.68	1.41	3.26	2.54		2	19.6	25.3	18.1	31	18.2	23.5		2	2.45	1.17	2.62	2.71	3.87	2.63
3	18.9	17.6	28.9	15.8	31.3	30.9		3	2.4	2.47	4.07	1.5	3.25	2.47		3	21.3	23.5	20	28.8	19.8	23.8		3	2.24	1.52	2.63	2.71	4.09	2.59
4	20.1	18.5	28.2	16.2	29.8	29.7		4	2.41	2.49	3.94	1.71	3.22	2.48		4	21	23.1	20.7	28.3	19.3	23.5		4	2.26	1.59	2.66	2.79	3.99	2.56
5	20.2	19.4	27.6	17.5	28.7	28.8		5	2.39	2.44	3.71	1.66	3.14	2.53		5	21.2	23.4	20.1	28.5	19.5	25.4		5	2.17	1.54	2.58	2.69	4.06	2.57
6	20.5	20.2	27.6	18.2	28.4	27.6		6	2.45	2.49	3.63	1.71	3.13	2.55		6	21.2	23.4	20.4	26.3	20.3	25.2		6	2.2	1.74	2.56	2.63	4.02	2.56
Figure 4-figure supplement 3D: Vpc/Vegp
Mouse	Rat
0.83	0.83
0.75	0.73
0.88	0.74
0.77	0.72
0.92	0.82
0.73	0.78
Figure 4-figure supplement 3E: Vpc/Vcs
Mouse	Rat
0.902381	0.614841
0.785714	0.458095
0.842213	0.685824
0.977186	0.245567
1.04902	0.389234
0.806854	0.355914
Figure 4-figure supplement 3F: Vpdh/Vcs
Mouse	Rat
0.113009	0.105131
0.148438	0.137485
0.08805	0.085676
0.115727	0.115279
0.104208	0.098973
0.08008	0.103586
