# Supplementary material for: Gene and protein expression and metabolic flux analysis reveals metabolic scaling in liver ex vivo and in vivo
Source: eLife. 2023 May 23;12:e78335. doi: 10.7554/eLife.78335 (PMC10205083; doi:10.7554/eLife.78335)
Supplement: Figure 5—source data 1. [file elife-78335-fig5-data1.xlsx]

## Sheet: Fig 5
Glucose production
Mouse	Rat
4.675	1.879
6.514	1.941
4.622
6.619
