# Supplementary material for: Gene and protein expression and metabolic flux analysis reveals metabolic scaling in liver ex vivo and in vivo
Source: eLife. 2023 May 23;12:e78335. doi: 10.7554/eLife.78335 (PMC10205083; doi:10.7554/eLife.78335)
Supplement: Figure 6—source data 1. [file elife-78335-fig6-data1.xlsx]

## Sheet: Fig 6
Figure 6B: Glucose production (umol/g liver/min)
Mouse	Rat
3.69099	1.01614
5.13661	0.993397
6.32857	1.13319
6.35573	1.04635
	0.903785
	0.944767
Figure 6C: Vpc (umol/g liver/min)
Mouse	Rat
3.70944	0.934846
4.28907	0.980483
6.70829	1.04593
6.1015	0.999262
	0.891132
	0.939098
Figure 6D: Vcs (umol/g liver/min)
Mouse	Rat
2.87642	0.525783
2.54528	0.54907
5.96292	0.546801
3.76875	0.587801
	0.444059
	0.504161
Figure 6E: Vpdh (umol/g liver/min)
Mouse	Rat
0.216323	0.0377317
0.264929	0.0519092
0.581303	0.0431734
0.282048	0.0485597
	0.0357131
	0.0474561
Figure 6F: Fatty acid turnover (umol/kg/min)
Mouse	Rat
66.24	34.89
79.17	42.63
85.62	28.47
80.18	24.2
	28.69
	20.3
Figure 6G: Fatty acid oxidation (umol/g liver/min)
Mouse	Rat
2.6601	0.488051
2.28035	0.497161
5.38162	0.503627
3.4867	0.539241
	0.408346
	0.456705

## Sheet: Fig 6.Suppl 1
Figure 6-figure supplement 4A: 2H7 glucose APE (%)
Minutes	Mouse					Rat
100	1.59	1.86	2.4	3.53		13.72	12.29	12.52	13.57	14.67	12.83
110	1.79	1.88	2.51	3.36		13.7	12.7	12.93	13.8	14.62	13.11
120	1.57	1.67	2.58	3.69		13.96	12.23	12.46	13.51	15.04	12.77
Figure 6-figure supplement 4B: 13H lactate APE (%)
Minutes	Mouse					Rat
100	9.16	7.88	8.13	9.69		14.01	16.06	18.13	18.78	15.15	13.98
110	9.25	7.22	8.29	9.85		14.43	16.03	18.01	18.52	15.16	14.41
120	9.3	7.05	8.21	10.22		14.38	14.56	19.38	19.05	15.53	13.58
Figure 6-figure supplement 4C: 13C glucose APE (%)
Minutes	Mouse m+1					Mouse m+2					Rat m+1							Rat m+2
100	5.651	4.963	5.771	5.863		0.136	0.085	0.091	0.072		7.259	7.566	8.496	6.573	7.967	7.393		0.208	0.179	0.237	0.28	0.21	0.172
110	5.372	4.075	7.228	5.709		0.14	0.1	0.101	0.083		7.212	7.519	8.449	6.536	8.197	7.346		0.2	0.132	0.297	0.237	0.251	0.128
120	5.35	5.22	6.09	5.729		0.132	0.1	0.098	0.089		7.54	7.42	8.528	6.311	8.322	7.104		0.203	0.143	0.262	0.234	0.249	0.155
Figure 6-figure supplement 4D: blood glucose (mg/dL)
Minutes	Mouse							Rat
100	121	132	110	110	132	118		110	121	109	117	103	106
110	115	133	124	124	132	124		116	103	116	114	106	125
120	116	121	140	122	128	120		120	112	114	112	116	102
Figure 6-figure supplement 4E: Plasma lactate (mM)
Minutes	Mouse							Rat
100	0.84	1.11	1.16	1	1.25	1.5		1.31	1.11	1.49	1.61	0.86	1.36
110	0.87	1.09	0.98	1.25	1.07	1.38		1.01	0.94	1.19	0.86	1.36	1.47
120	1.35	0.88	0.84	1.35	1.41	1.49		0.81	1.69	1.25	1.13	0.93	1.34
Figure 6-figure supplement 4F: Liver glycogen (umol/g)
Mouse (fed)	424	440	413	451	426
Rat (fed)	398	374	411	403	398
Mouse (overnight fasted)	4.4	10.3	5.2	2.1	0
Rat (overnight fasted)	10.8	4.3	11.6	4.4	10.6
Figure 6-figure supplement 4G: Liver glycogen (umol/g)							Net hepatic glycogenolysis (umol/g/hr)
Mouse (0 hr fasted)	422	394	389	416	430		Mouse	56.8
Rat (0 hr fasted)	404	422	398	372	387		Rat	43.8
Mouse (4 hr fasted)	198	144	206	192	175
Rat (4 hr fasted)	212	226	245	209	215
Figure 6-figure supplement 4H: Vpc/Vgp
Mouse	1.005	0.835	1.06	0.96
Rat	0.92	0.987	0.923	0.955	0.986	0.994
Figure 6-figure supplement 4I: Vpc/Vcs
Mouse	1.2896	1.68511	1.125	1.61897
Rat	1.77801	1.78571	1.91282	1.7	2.00679	1.86269
Figure 6-figure supplement 4J: Vpdh/Vcs
Mouse	0.0752056	0.104086	0.0974862	0.0748387
Rat	0.0717629	0.0945402	0.0789564	0.0826125	0.0804241	0.0941288
Figure 6-figure supplement 4K: glucose production (umol/g liver/min)
Mouse - male	3.69099	5.13661	6.32857	6.35573
Mouse - female	4.25	6.13	3.48	5.12	5.83	5.92
Rat - male	1.01614	0.993397	1.13319	1.04635	0.903785	0.944767
Rat - female	1.32	0.95	1.16	1.43	0.87	1.12
Figure 6-figure supplement 4L: Vpc (umol/g liver/min)
Mouse - male	3.70944	4.28907	6.70829	6.1015
Mouse - female	4.04	5.26	6.18	5.53	5.21	5.17
Rat - male	0.934846	0.980483	1.04593	0.999262	0.891132	0.939098
Rat - female	1.04	0.86	0.97	1.28	0.65	0.93
Figure 6-figure supplement 4M: Vcs (umol/g liver/min)
Mouse - male	2.87642	2.54528	5.96292	3.76875
Mouse - female	4.18	3.84	3.26	4.02	4.34	2.96
Rat - male	0.525783	0.54907	0.546801	0.587801	0.444059	0.504161
Rat - female	0.46	0.51	0.68	0.41	0.43	0.37
Figure 6-figure supplement 4N: Vpdh (umol/g liver/min)
Mouse - male	0.216323	0.264929	0.581303	0.282048
Mouse - female	0.454	0.468	0.391	0.245	0.291	0.33
Rat - male	0.0377317	0.0519092	0.0431734	0.0485597	0.0357131	0.0474561
Rat - female	0.052	0.038	0.061	0.045	0.042	0.028
Figure 6-figure supplement 4O: Vfao (umol/g liver/min)
Mouse - male	2.6601	2.28035	5.38162	3.4867
Mouse - female	3.82	2.14	2.59	3.68	4.24	4.07
Rat - male	0.488051	0.497161	0.503627	0.539241	0.408346	0.456705
Rat - female	0.55	0.43	0.39	0.56	0.48	0.39
Figure 6-figure supplement 4P: Fatty acid turnover (umol/kg/min)
Mouse - male	66.24	79.17	85.62	80.18
Mouse - female	61.56	73.24	79.18	88.29	73.45	81.29
Rat - male	34.89	42.63	28.47	24.2	28.69	20.3
Rat - female	28.29	35.45	43.86	41.29	35.67	32.4
